# Supplementary material
Source: PubMed Central journal article supplement (PMC5373663)

### **Supplementary Figure 1**

Levels of folate enzymes in E-Wnt, M-Wnt or metM-Wnt<sup>liver</sup> cells measured by a dot blot assay. Cells were grown in standard (2.2  $\mu$ M folic acid) or folate-free media for 72 h. Each sample was assayed in triplicate.

### **Supplementary Figure 2**

Folate restriction inhibits cellular migration. Wound healing scratch assay for E-Wnt, M-Wnt or metM-Wnt<sup>liver</sup> cells maintained on standard (2.2  $\mu$ M folic acid) or folate-free (*FF*) media. Cells were grown in special plates until become confluent. These plates have inserts to ensure that the cell-free area ("wound") in the middle of grown cells is the same in all wells. Upon removing the inserts, cells are allowed to move to the cell-free area. The time-dependent gap closure in the middle of cell culture was indicative of cellular migration.



Supplementary Figure 2

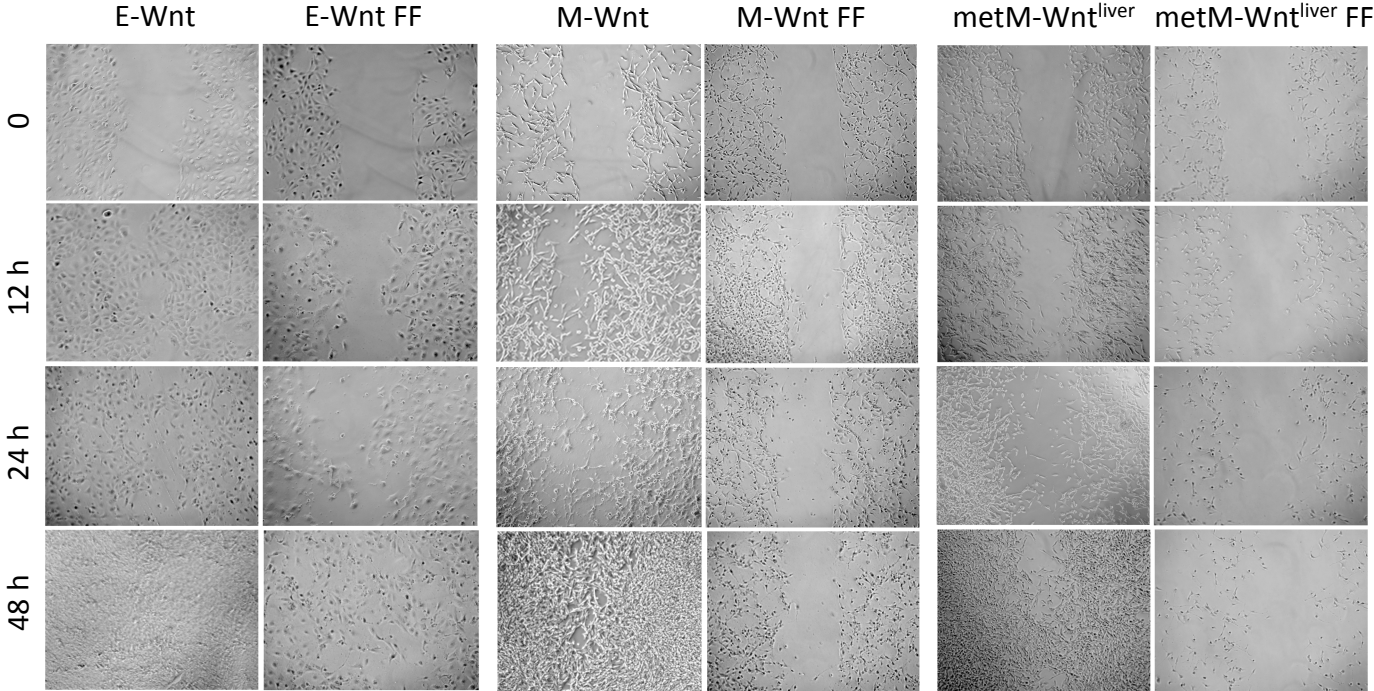

Supplement: NIHMS830618-supplement-1.pdf [file NIHMS830618-supplement-1.pdf]
